# Supplementary material for: Role of TLR5 in the Translocation and Dissemination of Commensal Bacteria in the Intestine after Traumatic Hemorrhagic Shock
Source: Hindawi journal article supplement (doi:10.1155/2021/6417658), 2021-11-19
Supplement: f1 [file 6417658.f1.pdf]

## SUPPLEMENTARY FIGURES AND FIGURE LEGENDS

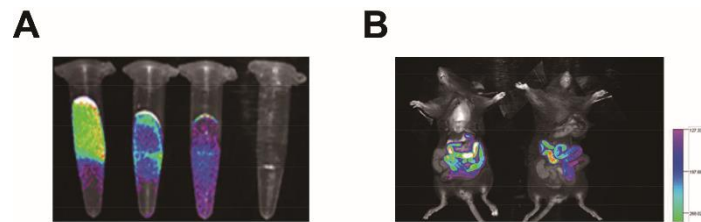

**Fig. S1. Bacterial translocation model.**

Bioluminescent *C. rodentium* was employed to monitor bacterial translocation. (A, B) Bioluminescent *C. rodentium* could be visualized using an in vivo imaging system (IVIS). (A) The bioluminescence intensity decreased as the bacterial suspension was serially diluted. (B) IVIS image of bacteria in the intestine of mice after oral gavage.

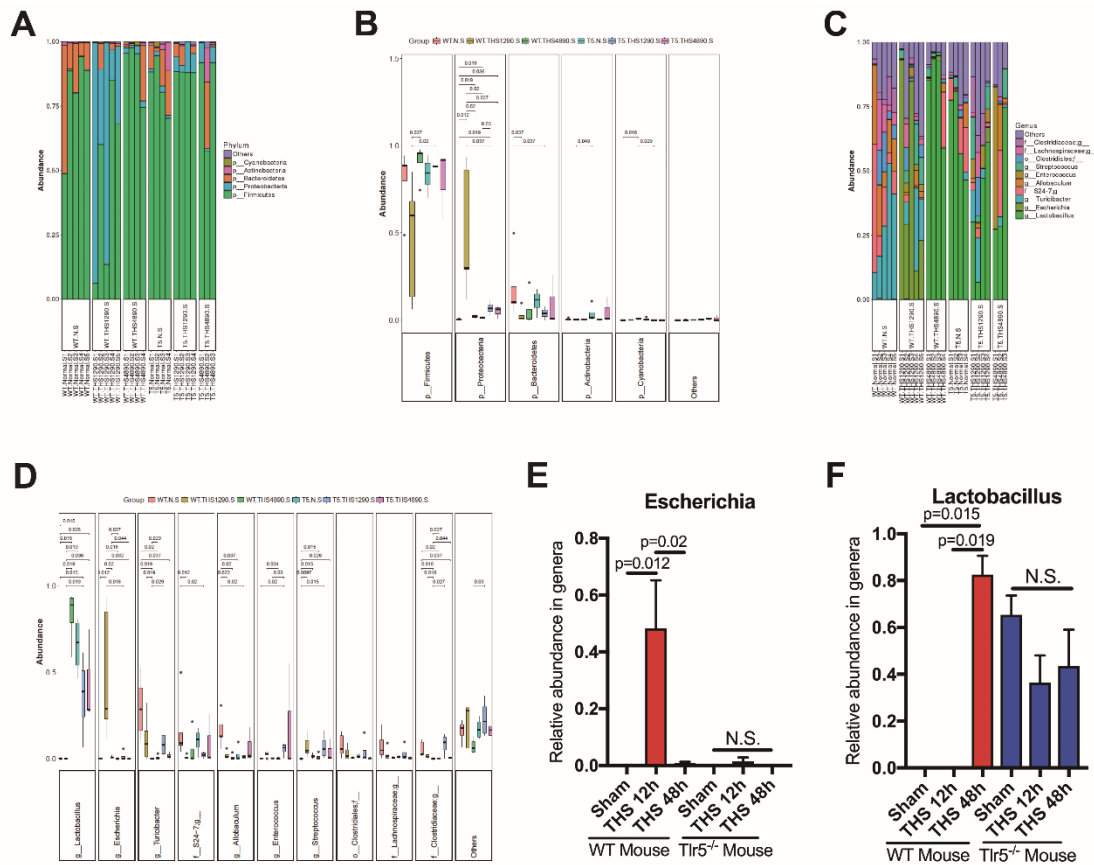

**Fig. S2. Effect of TLR5 deficiency on the profile of microbial composition after THS**

Microbial composition in the small intestines of sham-operated (WT.N.S (n=5) and T5.N.S (n=4)), 12 hours post-THS (WT.TH51290.S (n=5), T5.TH51290.S (n=4)) mice, 48 hours post-THS (WT.TH54890.S (n=4), T5.TH54890.S (n=3)) of different genotypes (WT and *Tlr5*<sup>-/-</sup>) in the phylum level (A and B) and genera level (C and D). (E) Relative abundance changes of *Escherichia* genera (E) and *Lactobacillus* genera (F) within small intestine of sham-operated and post-THS WT or *Tlr5*<sup>-/-</sup> mice. Data represent the mean ± SD, and number of mice in each group is described before. All significant p values are indicated, p<0.05 is considered significant by the one-way ANOVA test.

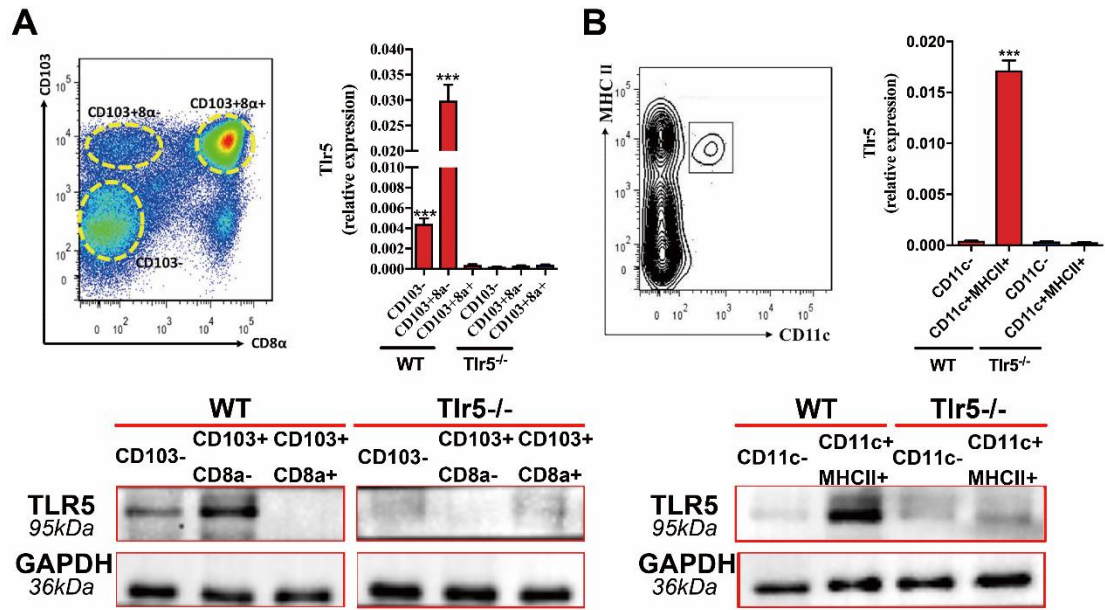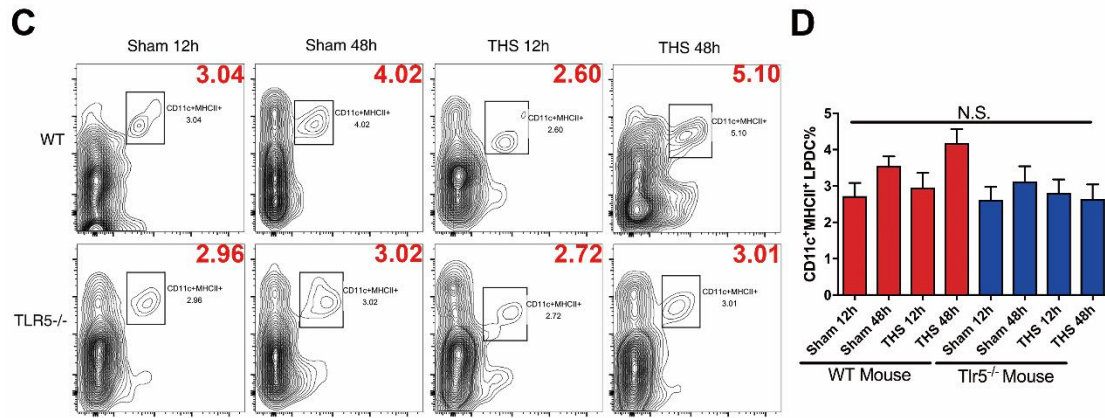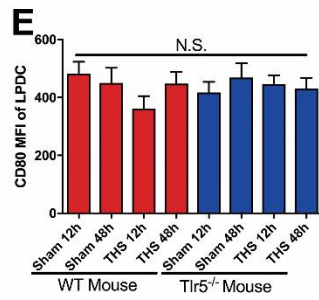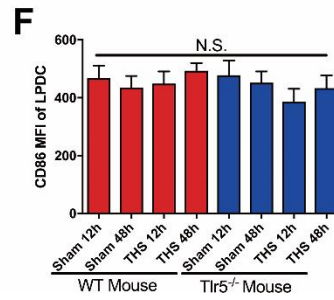

**Fig. S3. Identification and basic characteristics of TLR5<sup>+</sup> LPDCs**

CD103 plus CD8a (A) or CD11c plus MHCII (B) were used to sort the different subgroups of LPDCs from the intestinal LP, and TLR5 expression was analyzed by RT-PCR and western blot. The percentages of CD11c<sup>+</sup> MHCII<sup>+</sup> LPDCs in the LP among the groups were analyzed (C) and compared (D). (E) CD80 (E) and CD86(F) expression in the CD11c<sup>+</sup>MHCII<sup>+</sup> LPDCs from each group were compared. Each group contained 8 animals, and data are expressed as the mean  $\pm$  SD, representative of three independent experiments. All significant p values are marked and  $p < 0.05$  is considered significant by the one-way ANOVA test.

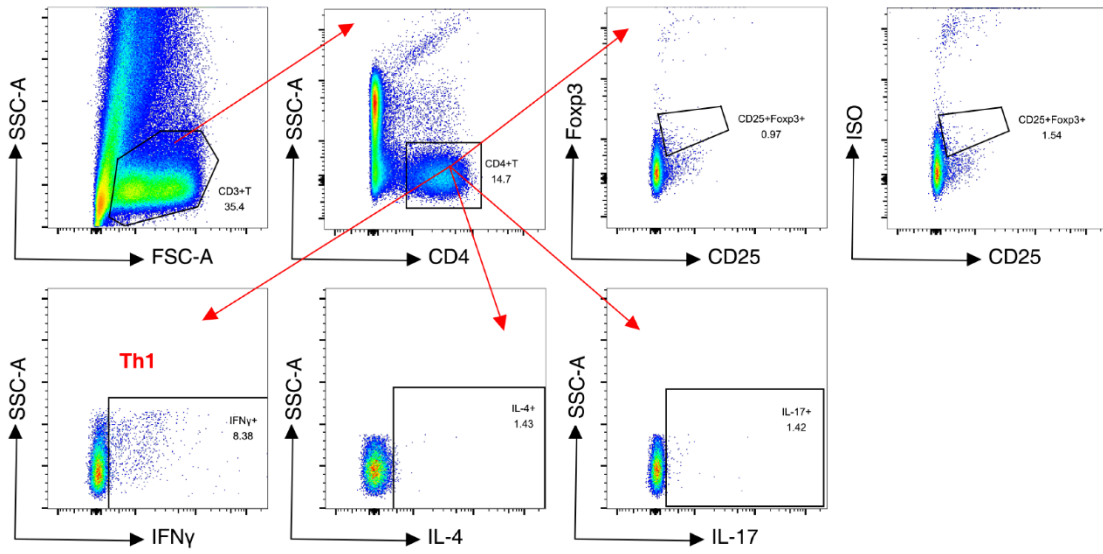

**Fig. S4. Flowchart of Th1 analysis in the LP**

T cell subgroups were gated on CD4<sup>+</sup> cells from LP single cells. Then Th1 cells were gated on IFN $\gamma$ <sup>+</sup>, Th2 cells were gated on IL-4<sup>+</sup>, Th17 cells were gated on IL-17<sup>+</sup>, and Treg cells were gated on CD25<sup>+</sup>Foxp3<sup>+</sup>.

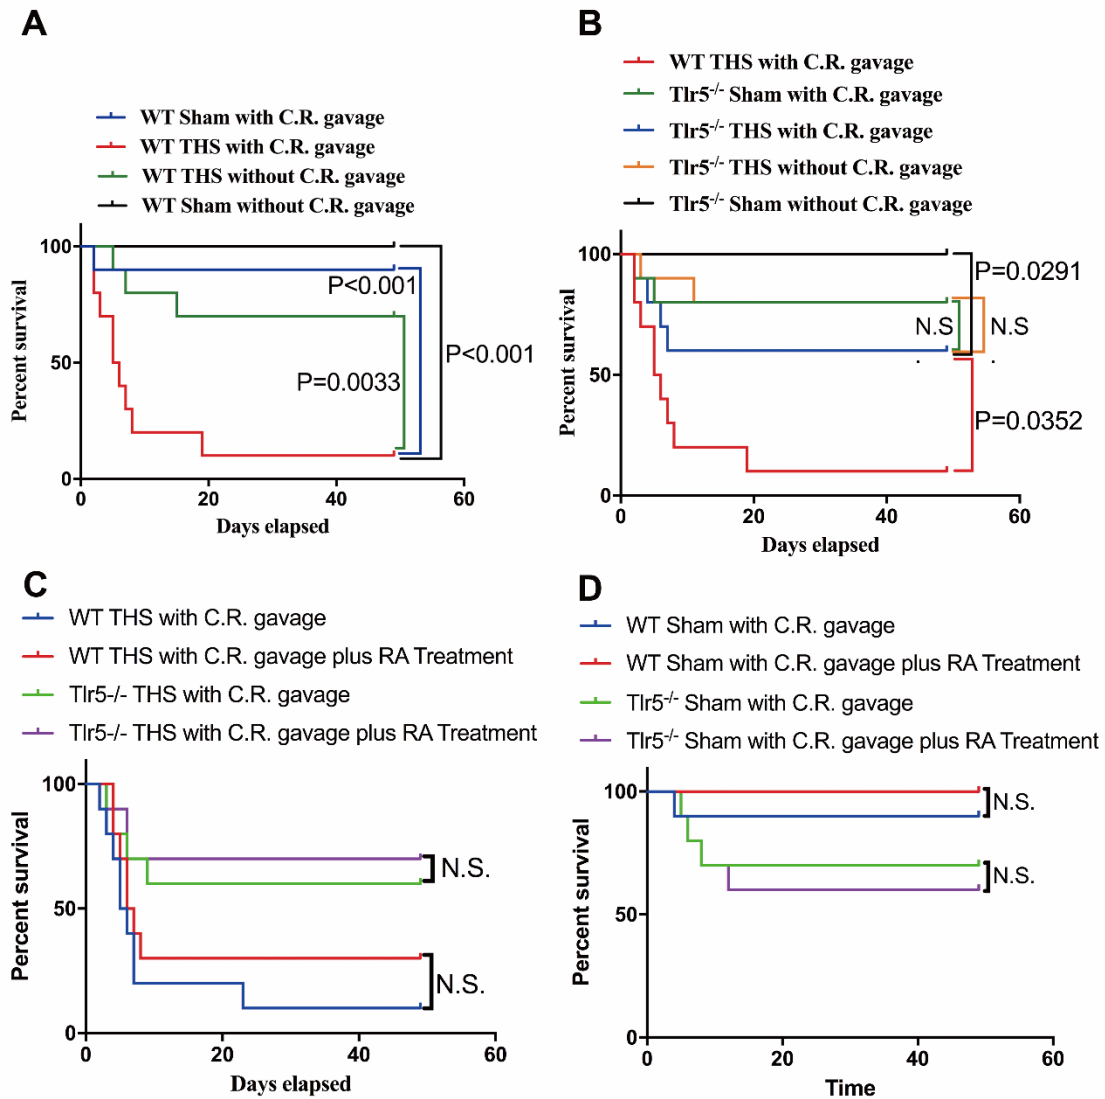

**Fig. S5. Survival analysis.**

Mouse survival was monitored for 2 months every 2 or 3 days after the treatments.

Comparisons were made between the different groups shown in the figure (A–D). Each group contained 10 animals. The data represent three independent experiments.

Survival was analyzed using the Kaplan–Meier method with log-rank test, and  $p < 0.05$

is considered significant.
